# Supplementary material
Source: PubMed Central journal article supplement (PMC3128463)
Supplement: pr200262q_si_001.pdf [file pr200262q_si_001.pdf]

**Table S1**

| <b>STRING ID<sup>a</sup></b> | <b>Protein ID<sup>b</sup></b>                                                                     | <b>Peptides<sup>c</sup></b> | <b>MW<sup>d</sup></b> | <b>UniProt<sup>e</sup></b> | <b>Location<sup>f</sup></b> | <b>Function<sup>g</sup></b>  |
|------------------------------|---------------------------------------------------------------------------------------------------|-----------------------------|-----------------------|----------------------------|-----------------------------|------------------------------|
| ACTBL2                       | Actin, beta-like 2                                                                                | 4                           | 42003                 | B2RPJ1                     | CSK                         | Structural                   |
| ACTG1                        | Gamma-actin                                                                                       | 2                           | 17136                 | P63261                     | CSK                         | Structural                   |
| FKSG30                       | Kappa-actin                                                                                       | 2                           | 42016                 | Q9BYX7                     | CSK                         | Actin turnover               |
| ACTG1                        | Actin-like protein                                                                                | 2                           | 11536                 | Q562M3                     | CSK                         | Actin turnover               |
| ACTR2                        | Actin-related protein 2 isoform B                                                                 | 2                           | 44760                 | P61160                     | CSK                         | Actin turnover               |
| ARPC2                        | Actin related protein 2/3 complex                                                                 | 6                           | 34333                 | O15144                     | CSK                         | Actin turnover               |
| ARPC                         | Actin related protein 2/3 complex isoform A                                                       | 5                           | 19667                 | P59998                     | CSK                         | Actin turnover               |
| ACTR1A                       | ARP1 actin-related protein 1 homolog A                                                            | 2                           | 42613                 | B2R6B0                     | CSK                         | Actin turnover               |
| ACTR3                        | ARP3 actin-related protein 3 homolog                                                              | 3                           | 47357                 | Q59FV6                     | CSK                         | Actin turnover               |
| ENSG00000206393              | Phostensin                                                                                        | 2                           | 35379                 | Q6NYC8                     | CSK                         | Actin-binding                |
| NA                           | Fimbrin                                                                                           | 3                           | 30499                 | 157829993                  | CSK                         | Actin-binding                |
| ANXA5                        | Annexin V                                                                                         | 13                          | 35804                 | P08758                     | PM                          | Actin-binding                |
| TWF2                         | Twinfilin 2                                                                                       | 3                           | 39471                 | Q6IBS0                     | CSK                         | Actin-binding                |
| LCP1                         | L-plastin 1                                                                                       | 15                          | 70289                 | P13796                     | C                           | Actin-binding                |
| MARCKS                       | Myristoylated alanine-rich C-kinase substrate                                                     | 2                           | 31544                 | P29966                     | C/PM/CSK                    | Actin-binding                |
| GSN                          | Gelsolin isoform A precursor                                                                      | 8                           | 85697                 | P06396                     | S/CSK                       | Actin turnover               |
| EPB41L3                      | Band 4.1-like protein 3                                                                           | 2                           | 123704                | Q9Y2J2                     | CSK                         | Actin turnover               |
| CAPG                         | Macrophage Capping Protein Cap G                                                                  | 2                           | 38524                 | P40121                     | CSK                         | Actin turnover               |
| MSN                          | Moesin                                                                                            | 3                           | 67820                 | P26038                     | PM/CSK                      | Actin-PM cross-talk          |
| VIL2                         | Ezrin                                                                                             | 4                           | 69398                 | P15311                     | PM                          | Actin-PM cross-talk          |
| CORO1A                       | Coronin, actin binding protein, 1A                                                                | 3                           | 53249                 | P31146                     | CSK/EV                      | Actin-PM cross-talk          |
| CYFIP1                       | Cytoplasmic FMR1-interacting protein 1                                                            | 2                           | 147134                | Q7L576                     | PM/CSK                      | Actin-PM cross-talk          |
| PFN1                         | Profilin 1                                                                                        | 6                           | 14852                 | P07737                     | CSK                         | Actin-binding                |
| CFL1                         | Cofilin 1                                                                                         | 4                           | 18502                 | P23528                     | CSK                         | Actin-binding                |
| GSN                          | Gelsolin                                                                                          | 2                           | 41704                 | P06396                     | PM/CSK                      | Actin-binding                |
| GC                           | Vitamin D-Binding Protein                                                                         | 2                           | 41816                 | P02774                     | S/CSK                       | Actin-binding                |
| CAP1                         | Adenylyl cyclase-associated protein (CAP1)<br>F-actin-capping protein subunit beta (CapZ<br>beta) | 8                           | 51673                 | Q01518                     | PM/CSK                      | Actin turnover               |
| CAPZB                        |                                                                                                   | 2                           | 31350                 | P47756                     | CSK                         | Actin turnover               |
| CAPZA1                       | F-actin capping protein                                                                           | 3                           | 32923                 | P52907                     | CSK                         | Actin turnover               |
| CAPZA2                       | Capping protein (actin filament)                                                                  | 4                           | 32949                 | Q53GC7                     | CSK                         | Actin turnover               |
| ACTN1                        | Actinin, alpha 1                                                                                  | 9                           | 103057                | P12814                     | CSK                         | Actin-anchoring and bundling |
| ACTN4                        | Alpha actinin 4                                                                                   | 3                           | 102268                | O43707                     | CSK                         | Actin-anchoring and bundling |
| FLNA                         | Alpha-filamin                                                                                     | 37                          | 280757                | P21333                     | CSK                         | Actin-anchoring and bundling |
| FLNB                         | Beta-filamin                                                                                      | 7                           | 278191                | O75369                     | CSK                         | Actin-anchoring and bundling |
| DES                          | Desmin                                                                                            | 2                           | 53535                 | P17661                     | PM/CSK                      | Actin-anchoring to the PM    |
| CAPNS1                       | Calpain                                                                                           | 2                           | 28316                 | P04632                     | PM                          | Actin arrangement            |
| IQGAP2                       | Ras GTPase-activating-like protein IQGAP2                                                         | 8                           | 180611                | Q13576                     | CSK                         | Actin arrangement            |
| ARHGDIIB                     | Rho GDP dissociation inhibitor (GDI) beta                                                         | 2                           | 22988                 | P52566                     | CSK/EV                      | Actin arrangement            |
| LSP1                         | Lymphocyte antigen (LSP1)                                                                         | 3                           | 37235                 | P33241                     | PM/CSK                      | Actin arrangement            |
| TLN1                         | Talin-1                                                                                           | 32                          | 269764                | Q9Y490                     | PM/CSK                      | Actin-PM cross-talk          |
| ZYX                          | Zyxin                                                                                             | 2                           | 61277                 | Q15942                     | PM/CSK                      | Adhesion plaque protein      |
| PTPRC                        | Protein tyrosine phosphatase, receptor C<br>(CD45)                                                | 2                           | 147253                | P08575                     | PM                          | Adhesion                     |
| ARHGAP4                      | Rho GTPase-activating protein 4                                                                   | 2                           | 105055                | P98171                     | PM/CSK                      | Adhesion                     |
| ARHGDI A                     | GDP dissociation inhibitor 1                                                                      | 3                           | 50582                 | P52565                     | C/CSK                       | Adhesion                     |
| PLEK                         | Pleckstrin                                                                                        | 4                           | 40083                 | P08567                     | ECM                         | Adhesion                     |
| C20orf42                     | Kindlin-1                                                                                         | 2                           | 75634                 | Q9BQL6                     | PM                          | Adhesion                     |
| FERMT3                       | Kindlin-3                                                                                         | 4                           | 75952                 | Q86UX7                     | PM                          | Adhesion                     |
| LGALS3                       | Mac-2 antigen                                                                                     | 5                           | 26188                 | P17931                     | PM                          | Adhesion                     |
| ITGAX                        | Integrin alpha-X (CD11c)                                                                          | 4                           | 127896                | P20702                     | PM                          | Adhesion                     |
| ITGAM                        | Integrin alpha M precursor (CD11b)                                                                | 3                           | 127178                | P11215                     | PM                          | Adhesion                     |
| ITGB1                        | Integrin beta 1 isoform 1A precursor (CD29)                                                       | 2                           | 88415                 | P05556                     | PM/EV                       | Adhesion                     |
| ITGB4                        | Integrin, beta 4 (CD104)                                                                          | 8                           | 195013                | A0AVL6                     | PM                          | Adhesion                     |
| VCL                          | Vinculin isoform VCL                                                                              | 5                           | 116722                | P18206                     | PM                          | Adhesion                     |

|                 |                                                                                         |    |        |          |          |                                    |
|-----------------|-----------------------------------------------------------------------------------------|----|--------|----------|----------|------------------------------------|
| ITGB2           | Cell surface adhesion glycoprotein LFA-1(CD18)                                          | 3  | 83881  | P05107   | PM       | Adhesion                           |
| MYLCLB          | Myosin regulatory light chain MRCL2                                                     | 3  | 19779  | O14950   | CSK      | Cell contraction                   |
| MYL6            | Myosin, light polypeptide 6                                                             | 2  | 16961  | P60660   | CSK      | Cell contraction                   |
| DPYSL2          | Dihydropyrimidinase-like 2                                                              | 3  | 62293  | Q16555   | CSK      | Cell contraction                   |
| TUBA1A          | Alpha tubulin                                                                           | 2  | 49698  | Q71U36   | CSK      | Structural                         |
| TUBA1C          | tubulin alpha 6                                                                         | 7  | 49895  | Q53GA7   | CSK      | Structural                         |
| ENSG00000137379 | Beta-tubulin                                                                            | 7  | 48880  | Q6LC01   | CSK      | Structural                         |
| NA              | Diff6,H5,CDC10 homologue                                                                | 4  | 46585  | Q15019   | CSK      | Microtubule assembly               |
| MAP4            | Microtubule-associated protein 4                                                        | 2  | 103328 | P27816   | CSK      | Microtubule assembly               |
| TCP1            | T-complex protein 1 isoform A                                                           | 3  | 60343  | P17987   | CSK      | Microtubule assembly               |
| ALDOA           | Aldolase                                                                                | 6  | 39289  | P04075   | C/CSK/EV | Actin and microtubule organization |
| HSPB1           | Heat shock 27kDa protein 1                                                              | 2  | 22782  | P04792   | C/CSK    | Actin and microtubule organization |
| VIM             | Vimentin                                                                                | 20 | 52438  | P08670   | C/S      | Structural/Intermediate filaments  |
| PLEC1           | Plectin                                                                                 | 12 | 518488 | Q15149   | CSK      | Structural/Intermediate filaments  |
| LMNB1           | Lamin B1                                                                                | 6  | 66408  | P20700   | CSK/N    | Structural/Intermediate filaments  |
| CT5             | Chaperonin containing TCP1                                                              | 3  | 59671  | A8JZY8   | C        | Chaperone                          |
| ENSG00000187978 | Heat shock protein 60                                                                   | 5  | 61054  | P10809   | M        | Chaperone                          |
| HSPA1L          | Heat shock 70 kDa protein 1L                                                            | 3  | 70405  | P34931   | C/PM     | Chaperone                          |
| HSPA6           | Heat shock 70kDa protein 6                                                              | 3  | 71028  | P17066   | C/PM     | Chaperone                          |
| HSPA2           | Heat shock 70kDa protein 2                                                              | 3  | 70021  | P54652   | C/PM     | Chaperone                          |
| HSPA1B          | Heat shock 70kDa protein 1A                                                             | 3  | 70052  | A8K510   | C/PM     | Chaperone                          |
| HSPA8           | Heat shock 70kDa protein 8                                                              | 4  | 53517  | P11142   | C/PM     | Chaperone                          |
| PARK7           | Parkinson disease protein 7                                                             | 3  | 19891  | Q99497   | C        | Chaperone                          |
| RNH1            | Ribonuclease inhibitor                                                                  | 2  | 49905  | P13489   | C        | Protein biosynthesis               |
| HNRPA1          | Heterogeneous ribonucleoprotein A1                                                      | 2  | 20037  | P09651   | C        | Protein biosynthesis               |
| BACH1           | Transcription regulator BACH1                                                           | 2  | 73258  | O14867   | N        | Protein biosynthesis               |
| HNRPN           | RNA-Recognition Motif Domain Of Hnmp A1                                                 | 2  | 22263  | P09651   | C        | Protein biosynthesis               |
| NA              | Prohibitin 2                                                                            | 4  | 33296  | Q99623   | M        | Protein biosynthesis               |
| NA              | Glutamyl-tRNA synthetase                                                                | 3  | 163025 | CAA38224 | C        | Protein biosynthesis               |
| KPNB1           | Importin 1                                                                              | 2  | 97170  | Q14974   | C/N      | Protein biosynthesis               |
| ENSG00000096171 | Valyl-tRNA synthetase (VAR5)                                                            | 2  | 140475 | P26640   | C        | Protein biosynthesis               |
| MATR3           | Matrin 3                                                                                | 3  | 94623  | P43243   | N        | Protein biosynthesis               |
| SFPQ            | Splicing factor proline/glutamine rich                                                  | 2  | 76149  | P23246   | N        | Protein biosynthesis               |
| DDX3X           | DEAD/H (Asp-Glu-Ala-Asp/His) box                                                        | 4  | 73243  | O00571   | PM/C     | Protein biosynthesis               |
| DUSP3           | Dual specificity phosphatase 3                                                          | 2  | 20478  | P51452   | C        | Protein metabolism                 |
| ABHD10          | Abhydrolase domain containing 10                                                        | 3  | 33932  | Q9NUJ1   | M        | Protein metabolism                 |
| GARS            | Glycyl-tRNA synthetase                                                                  | 2  | 77530  | P41250   | S        | Protein metabolism                 |
| CNDP2           | Glutamate carboxypeptidase                                                              | 5  | 52852  | Q96KP4   | C        | Protein metabolism                 |
| SHMT2           | Serine hydroxymethyltransferase 2                                                       | 2  | 55993  | P34897   | M        | Protein metabolism                 |
| WARS            | Tryptophanyl-tRNA synthetase isoform A                                                  | 3  | 53165  | P23381   | C        | Protein metabolism                 |
| PSMD2           | Proteasome 26S non-ATPase subunit 2                                                     | 3  | 100199 | Q13200   | C        | Protein transport/Turnover         |
| PSMD3           | Proteasome beta 3 subunit                                                               | 2  | 22949  | P49720   | C        | Protein transport/Turnover         |
| PSMB8           | Proteasome subunit beta-5i                                                              | 3  | 30354  | P28062   | C        | Protein transport/Turnover         |
| OTUB1           | Ubiquitin thioesterase OTUB1                                                            | 2  | 31312  | Q96FW1   | C        | Protein transport/Turnover         |
| HERC6           | E3 ubiquitin-protein ligase HERC6                                                       | 2  | 44541  | Q81VU3   | C        | Protein transport/Turnover         |
| UBE2L3          | Ubiquitin-conjugating enzyme E2L 3 isoform 1                                            | 2  | 17861  | P68036   | C        | Protein transport/Turnover         |
| PSMA2           | Proteasome alpha 2 subunit                                                              | 3  | 25898  | P25787   | C        | Protein transport/Turnover         |
| PSMB2           | Proteasome beta 2 subunit                                                               | 2  | 22836  | P49721   | C        | Protein transport/Turnover         |
| UBE1            | Ubiquitin-activating enzyme E1<br>Ubiquitin-like, containing PHD and RING finger domain | 8  | 117848 | P22314   | C        | Protein transport/Turnover         |
| UHRF1           |                                                                                         | 2  | 89813  | Q96T88   | N        | Protein transport/Turnover         |
| FTL             | Ferritin                                                                                | 4  | 20020  | Q96AU9   | C        | Redox                              |
| SQRDL           | Sulfide dehydrogenase like                                                              | 7  | 49960  | Q9Y6N5   | M        | Redox                              |
| CSTB            | Stefin B                                                                                | 3  | 11158  | P04080   | C        | Redox                              |
| BLVR1           | Biliverdin reductase A                                                                  | 3  | 33428  | P53004   | C/PM     | Redox                              |
| BLVRB2          | Biliverdin reductase B                                                                  | 5  | 22119  | P30043   | C/PM     | Redox                              |

|         |                                                                                      |    |        |        |      |                          |
|---------|--------------------------------------------------------------------------------------|----|--------|--------|------|--------------------------|
| AKR1C3  | Aldo-keto reductase family 1, member A1                                              | 2  | 36573  | P42330 | C    | Redox                    |
| SOD2    | Manganese superoxide dismutase                                                       | 3  | 24710  | P04179 | M    | Redox                    |
| GPX1    | Glutathione peroxidase                                                               | 3  | 21899  | P07203 | C    | Redox                    |
| GSTO1   | Glutathione-S-transferase omega 1                                                    | 2  | 27566  | P78417 | C    | Redox                    |
| GSTA1   | Glutathione transferase                                                              | 6  | 23356  | P08263 | C    | Redox                    |
| SPR     | Sepiapterin reductase                                                                | 3  | 28048  | P35270 | C    | Redox                    |
| GLUD2   | Glutamate dehydrogenase (NAD(P)+)                                                    | 2  | 61433  | P49448 | M    | Redox                    |
| CYP27A1 | Cytochrome P450 27                                                                   | 2  | 60263  | Q02318 | M    | Redox                    |
| CBR1    | Carbonyl reductase 1                                                                 | 4  | 30375  | P16152 | C    | Redox                    |
| HEBP1   | Heme binding protein 1                                                               | 2  | 21097  | Q9NRV9 | C    | Redox                    |
| SH3BGR3 | SH3 domain binding glutamic acid-rich protein like 3                                 | 2  | 10438  | Q9H299 | C    | Redox                    |
| RNPEP   | Aminopeptidase B                                                                     | 8  | 72623  | Q9H4A4 | PM/S | Leukotriene biosynthesis |
| ACAA2   | Acetyl-coenzyme A acyltransferase 2                                                  | 4  | 41924  | P42765 | M    | Lipid metabolism         |
| AADACL1 | Arylacamide deacetylase-like 1                                                       | 3  | 48072  | Q6PIU2 | PM   | Lipid metabolism         |
| ACADVL  | Acyl-CoA dehydrogenase                                                               | 7  | 70436  | P49748 | PM/M | Lipid metabolism         |
| TPI1    | Triosephosphate isomerase 1                                                          | 6  | 26669  | P60174 | C    | Lipid metabolism         |
| LTA4H   | Leukotriene A4 hydrolase                                                             | 7  | 69285  | P09960 | C/PM | Lipid metabolism         |
| HADHA   | Enoyl-CoA hydratase/3-hydroxyacyl-CoA dehydrogenase                                  | 4  | 82959  | P40939 | M    | Lipid metabolism         |
| EHHADH  | Peroxisomal enoyl-coenzyme A hydratase-like protein                                  | 4  | 35816  | Q58EZ5 | C    | Lipid metabolism         |
| PPAH1B2 | Acetylhydrolase, isoform Ib                                                          | 2  | 25569  | P68402 | C    | Lipid metabolism         |
| HADHB   | Acetyl-CoA acyltransferase                                                           | 3  | 51294  | P55084 | M    | Lipid metabolism         |
| ACLY    | ACLY variant protein                                                                 | 2  | 124556 | Q4LE36 | C    | Carbohydrate metabolism  |
| PCK2    | Phosphoenolpyruvate carboxykinase S62599 UTP-glucose-1-phosphate uridylyltransferase | 6  | 70637  | Q16822 | C    | Carbohydrate metabolism  |
| UGP2    | Pyruvate kinase, muscle isoform M2                                                   | 3  | 56965  | Q16851 | C    | Carbohydrate metabolism  |
| PKM2    | Pyruvate kinase, muscle isoform M2                                                   | 18 | 57937  | P14618 | C    | Carbohydrate metabolism  |
| GPI     | Glucose phosphate isomerase                                                          | 6  | 63147  | P06744 | C    | Carbohydrate metabolism  |
| GALM    | Galactose mutarotase (aldose 1-epimerase)                                            | 3  | 37765  | Q96C23 | C    | Carbohydrate metabolism  |
| PGK1    | Phosphoglycerate kinase 1                                                            | 7  | 44614  | P00558 | C    | Carbohydrate metabolism  |
| PGD     | Phosphogluconate dehydrogenase                                                       | 6  | 53140  | P52209 | C    | Carbohydrate metabolism  |
| ALDH2   | Aldehyde Dehydrogenase                                                               | 2  | 54445  | P05091 | M    | Carbohydrate metabolism  |
| MDH2    | Malate dehydrogenase                                                                 | 4  | 35531  | P40926 | M    | Carbohydrate metabolism  |
| DLST    | Dihydrolipoyllysine-residue succinyltransferase                                      | 3  | 48640  | P36957 | M    | Carbohydrate metabolism  |
| HK3     | Hexokinase 3                                                                         | 3  | 98919  | P52790 | C    | Carbohydrate metabolism  |
| ENO1    | Enolase 1                                                                            | 7  | 47169  | P06733 | C/PM | Carbohydrate metabolism  |
| ENO3    | Enolase 3                                                                            | 2  | 46987  | P13929 | C    | Carbohydrate metabolism  |
| TALDO1  | Transaldolase 1                                                                      | 6  | 37540  | P37837 | C    | Carbohydrate metabolism  |
| G6PD    | Glucose-6-phosphate 1-dehydrogenase                                                  | 5  | 59265  | P11413 | C    | Carbohydrate metabolism  |
| GAPDH   | Glyceraldehyde-3-phosphate dehydrogenase (GAPDH)                                     | 7  | 36053  | P04406 | C/PM | Carbohydrate metabolism  |
| PGK2    | Phosphoglycerate kinase 2                                                            | 2  | 44895  | P07205 | C    | Carbohydrate metabolism  |
| LHDB    | L-Lactate Dehydrogenase                                                              | 2  | 36507  | P07195 | C    | Carbohydrate metabolism  |
| FBP1    | Fructose-1,6-bisphosphatase 1                                                        | 8  | 36842  | P09467 | C    | Carbohydrate metabolism  |
| FBP2    | Fructose-1,6-bisphosphatase 2                                                        | 2  | 36743  | O00757 | C    | Carbohydrate metabolism  |
| APOB    | Apolipoprotein B-100 precursor (Apo B-100)                                           | 8  | 515561 | P04114 | S    | Lipid metabolism         |
| APOE    | Apolipoprotein E precursor                                                           | 2  | 36154  | P02649 | S    | Lipid metabolism         |
| MDH1    | Malate dehydrogenase                                                                 | 2  | 36426  | P40925 | C    | Carbohydrate metabolism  |
| NAGK    | N-Acetylglucosamine kinase                                                           | 2  | 37416  | Q9UJ70 | C    | Carbohydrate metabolism  |
| ACO2    | Aconitase 2 precursor                                                                | 3  | 85425  | Q99798 | M    | Carbohydrate metabolism  |
| TKT     | Transketolase                                                                        | 6  | 67877  | P29401 | C    | Carbohydrate metabolism  |
| ATP5B   | ATP synthase                                                                         | 8  | 57955  | P06576 | M    | ADP/ATP exchange         |
| ATP5D   | ATP synthase, H+ transporting, mitochondrial F1 complex                              | 2  | 17490  | P30049 | M    | ADP/ATP exchange         |
| SLC25A5 | ADP/ATP translocase 2                                                                | 2  | 32895  | P05141 | PM/M | ADP/ATP exchange         |
| ATP5O   | ATP synthase, O subunit precursor                                                    | 4  | 23277  | P48047 | PM/M | Proton transport         |
| KCTD7   | Potassium channel tetramerisation domain                                             | 3  | 35701  | A4D2M4 | PM   | PM voltage               |
| VDAC1   | Voltage-dependent anion channel 1 (VDAC1)                                            | 10 | 30772  | P21796 | PM   | Cell volume              |
| VDAC2   | VDAC2                                                                                | 3  | 30412  | P45880 | PM   | Membrane potential       |

|                 |                                                                    |    |        |        |      |                                           |
|-----------------|--------------------------------------------------------------------|----|--------|--------|------|-------------------------------------------|
| ENSG00000096238 | Chloride intracellular channel protein 1                           | 2  | 23543  | O00299 | PM   | Chloride ion transporter                  |
| ATP1A2          | Na <sup>+</sup> /K <sup>+</sup> -ATPase alpha 2 subunit proprotein | 2  | 112265 | P50993 | PM   | Na <sup>+</sup> /K <sup>+</sup> transport |
| ATP1A1          | Na <sup>+</sup> /K <sup>+</sup> -ATPase alpha 1 subunit isoform a  | 2  | 112895 | P05023 | PM   | Na <sup>+</sup> /K <sup>+</sup> transport |
| PTPN6           | Protein tyrosine phosphatase, non-receptor type 6                  | 4  | 67719  | P29350 | PM/C | Cell signaling                            |
| PTPRE           | Protein tyrosine phosphatase receptor type E                       | 2  | 80641  | P23469 | PM   | Cell signaling                            |
| PPP2R5A         | Pp2a, Pr65alpha                                                    | 2  | 65177  | Q15172 | C    | Cell signaling                            |
| PBEF1           | Nicotinamide phosphoribosyltransferase precursor                   | 4  | 55521  | P43490 | C    | Cell signaling                            |
| NA              | 14-3-3 protein gamma                                               | 3  | 28302  | P61983 | C    | Signaling Scaffold                        |
| YWHAZ           | 14-3-3 protein zeta/delta                                          | 3  | 27745  | P63104 | C    | Signaling Scaffold                        |
| RHOT2           | Ras homolog gene family, member G                                  | 3  | 21308  | A2IDC2 | C    | Calcium signaling                         |
| SLC25A24        | Calcium-binding transporter                                        | 3  | 45819  | Q6NUK1 | M    | Calcium regulation                        |
| IGAP1           | IQ motif containing GTPase activating protein 1                    | 29 | 189250 | A7MBM3 | C    | GTPase activating                         |
| C3              | Complement Component C3c                                           | 3  | 21496  | P01024 | S    | Immune response                           |
| ILF2            | Interleukin enhancer binding factor 2                              | 2  | 43062  | Q12905 | N    | Immune response                           |
| IL1RN           | Interleukin 1 receptor antagonist isoform 1 precursor              | 2  | 20055  | P18510 | S/C  | Immune response                           |
| ECGF1           | Platelet-derived endothelial cell growth factor                    | 5  | 49981  | P19971 | M    | Immune response                           |
| C1QBP           | Hyaluronan-binding protein 1                                       | 2  | 23801  | Q07021 | M    | Immune response                           |
| SERPING1        | Complement component 1 inhibitor precursor                         | 3  | 55154  | P05155 | S    | Immune response                           |
| CD14            | CD14 protein precursor                                             | 2  | 40136  | P08571 | PM   | Immune response                           |
| A2M             | Alpha-2-macroglobulin precursor (Alpha-2-M)                        | 20 | 163277 | P01023 | S    | Immune response                           |
| SAMHD1          | Monocyte protein 5                                                 | 4  | 72200  | Q9Y3Z3 | C    | Immune response                           |
| PYCARD          | PYD and CARD domain containing isoform A                           | 2  | 21627  | Q9ULZ3 | C    | Cellular survival                         |
| PRKAR1A         | cAMP-dependent protein kinase                                      | 2  | 42981  | P10644 | C    | Cellular survival                         |

<sup>a</sup> STRING database accession number (accessible at <http://string-db.org/>)

<sup>b</sup> Protein ID

<sup>c</sup> Number of unique significant ( $P < 0.05$ ) peptides identified for each protein

<sup>d</sup> Theoretical molecular mass for the primary translation product calculated from DNA sequences protein

<sup>e</sup> Accession numbers for UniProt (accessible at <http://www.uniprot.org/>)

<sup>f</sup> Postulated subcellular localization (accessible at <http://locate.imb.uq.edu.au> and

<http://www.uniprot.org/>) as follows: Plasma membrane (PM); secreted (S); cytoskeleton (CSK); cytosol

(C); mitochondria (M); nucleus (N); not available (NA, in this group are included proteins with no

postulated localization)

## Figure Legends

**Figure S1.** (A) Functional connectivity map of BC proteome generated on known and predicted protein-protein functional interactions of STRING database. Line thickness indicates level of interaction based on a confidence score. STRING map protein ID abbreviations are included in Table 1.
